# Supplementary material
Source: HighWire-hosted journal article supplement (https://jnm.snmjournals.org/highwire/filestream/109318/field_highwire_adjunct_files/0/263079_Supplemental_Data.pdf)
Supplement: 263079_Supplemental_Data.pdf [file 263079_Supplemental_Data.pdf]

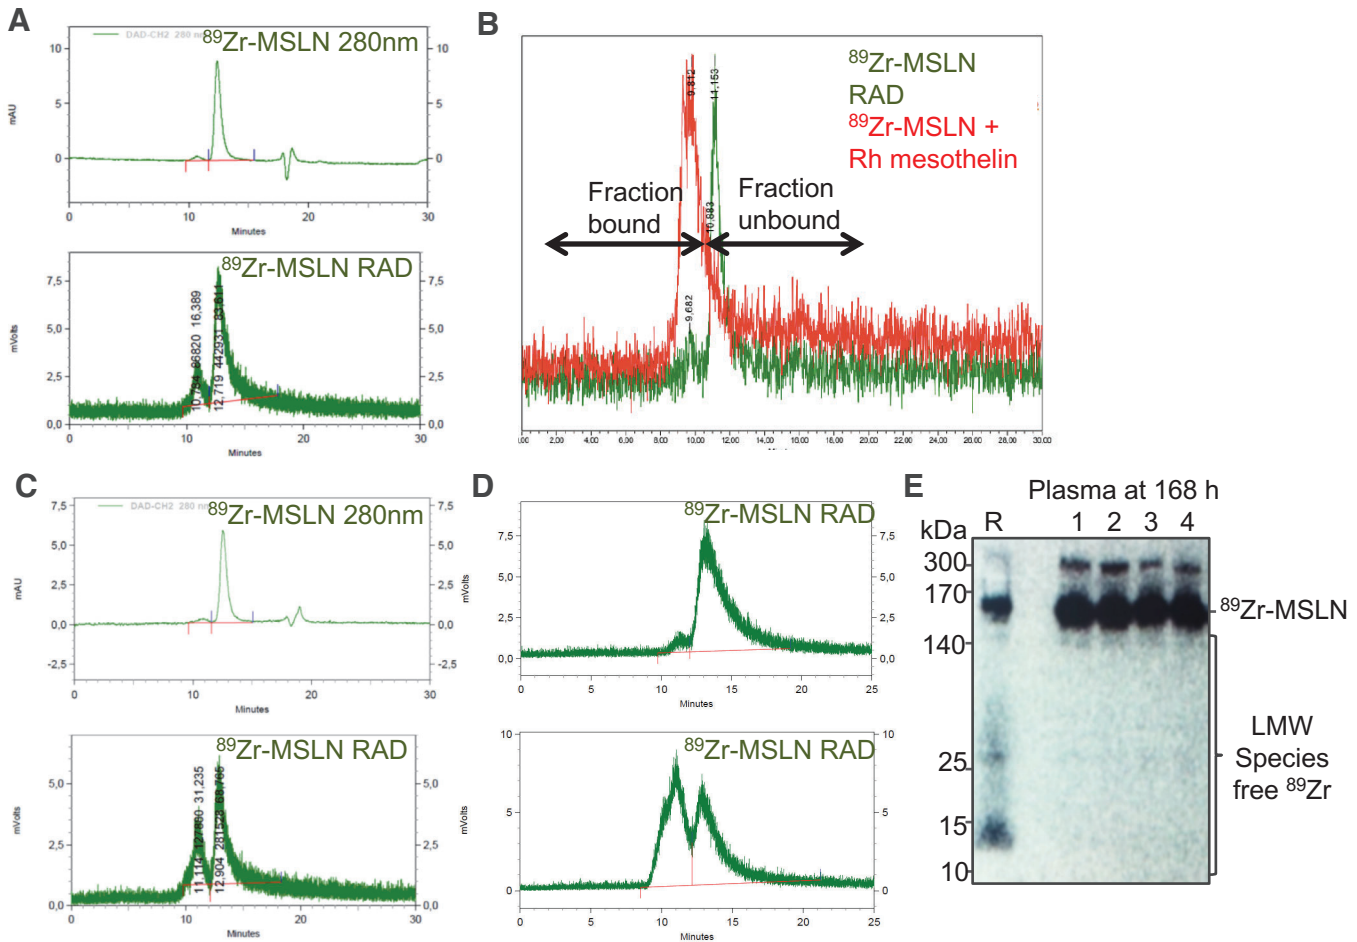

### Supplemental Figure 1. $^{89}\text{Zr}$ -MSLN quality control

Ultra-performance liquid chromatography data of **A** optimized  $^{89}\text{Zr}$ -MSLN,  $4\% \pm 1\%$  antibody dimers and  $15\% \pm 2\%$  radiolabeled dimers ( $n = 6$ ) **B** immunoreactive fraction: 0.8 **C**  $20 \mu\text{g}$   $^{89}\text{Zr}$ -MSLN preparation with 30% radioactive dimers **D**  $^{89}\text{Zr}$ -MSLN with 10% vs 60% radioactive dimers (at 280 nm  $\leq 5\%$  data not shown). On y-axis arbitrary units at 280 nm and millivolts at radioactivity detection. **E** *Ex vivo* tracer integrity of  $^{89}\text{Zr}$ -MSLN in plasma 168 h pi ( $n = 4$ ), determined by SDS PAGE, detected by autoradiography, R is  $^{89}\text{Zr}$ -MSLN 7 days at RT, including free  $^{89}\text{Zr}$ . LMW: low molecular weight. R: reference RAD: radioactivity detection Rh: recombinant human.

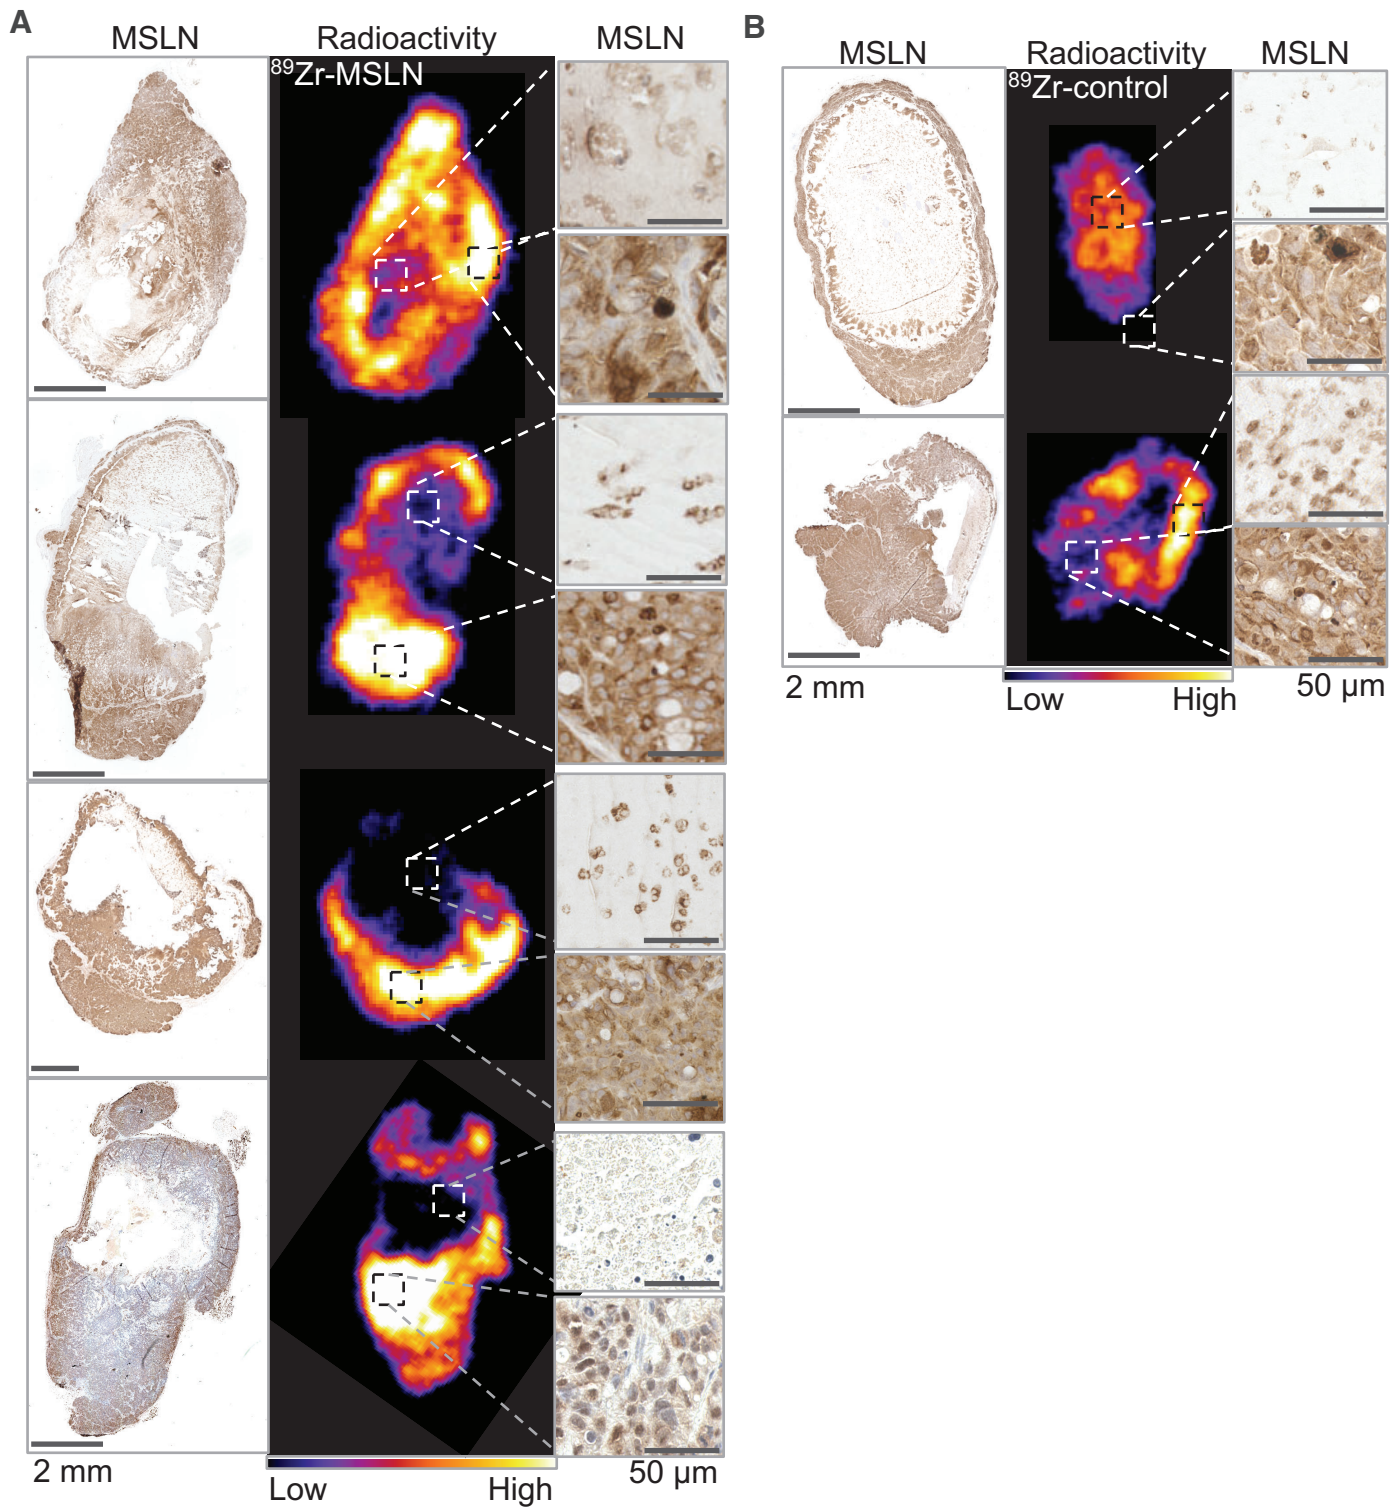

### Supplemental Figure 2. Intratumoral $^{89}\text{Zr-MSLN}$ distribution

Mesothelin immunohistochemistry and autoradiography of HT29-MSLN formalin-fixed, paraffin-embedded tumor sections, that received **A**  $^{89}\text{Zr-MSLN}$  or **B**  $^{89}\text{Zr-control}$ . Mesothelin immunohistochemistry and autoradiography are performed on the same tumor section. Radioactivity is simultaneously scaled in A and B from high to low  $^{89}\text{Zr}$  signal intensity. MSLN, Mesothelin.

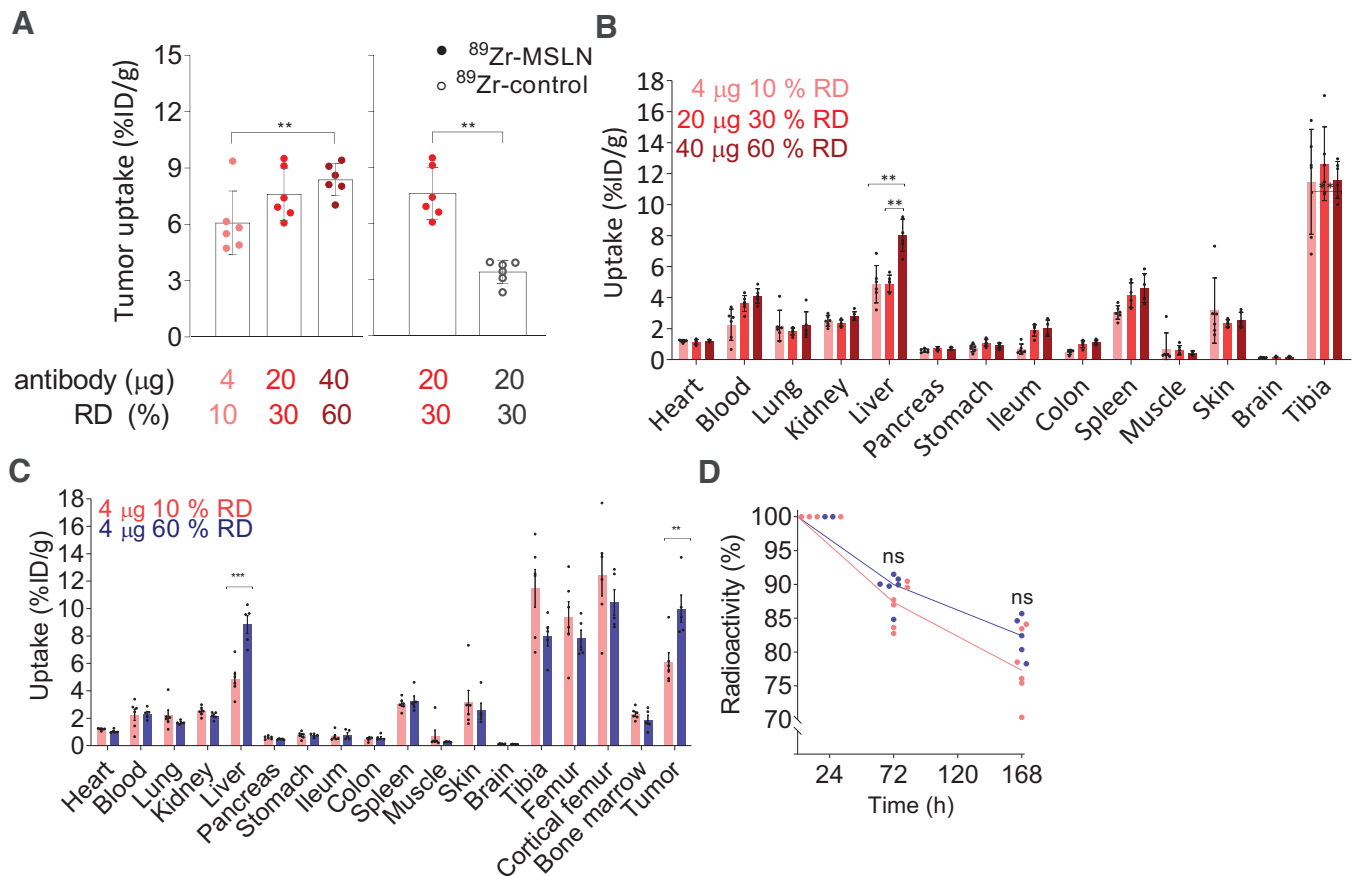

### Supplemental Figure 3. Dose- and dimer-effect of $^{89}\text{Zr}$ -MSLN on tumor and healthy tissue uptake

In BxPc3 tumor-bearing mice at 168 h pi **A** *Ex vivo* tumor uptake of 4  $\mu\text{g}$  10% RD, 20  $\mu\text{g}$  30% RD, 40  $\mu\text{g}$  60% RD  $^{89}\text{Zr}$ -MSLN and 20  $\mu\text{g}$  30%  $^{89}\text{Zr}$ -control. **B** *Ex vivo* biodistribution of 4  $\mu\text{g}$  10% RD, 20  $\mu\text{g}$  30% RD and 40  $\mu\text{g}$  60% RD  $^{89}\text{Zr}$ -MSLN. **C** *Ex vivo* biodistribution of 4  $\mu\text{g}$   $^{89}\text{Zr}$ -MSLN and **D** *in vivo* tracer kinetics, expressed as radioactivity, corrected for decay, with 10% and 60% radioactive dimers. Uptake in tumor and healthy tissues is presented as percentage of injected dose per gram tissue (%ID/g), shown as mean  $\pm$ SD, including single data points. \*\*\*:  $P < 0.001$  \*\*:  $P < 0.01$ , with Bonferroni correction when comparing doses (A). RD: radioactive dimers.

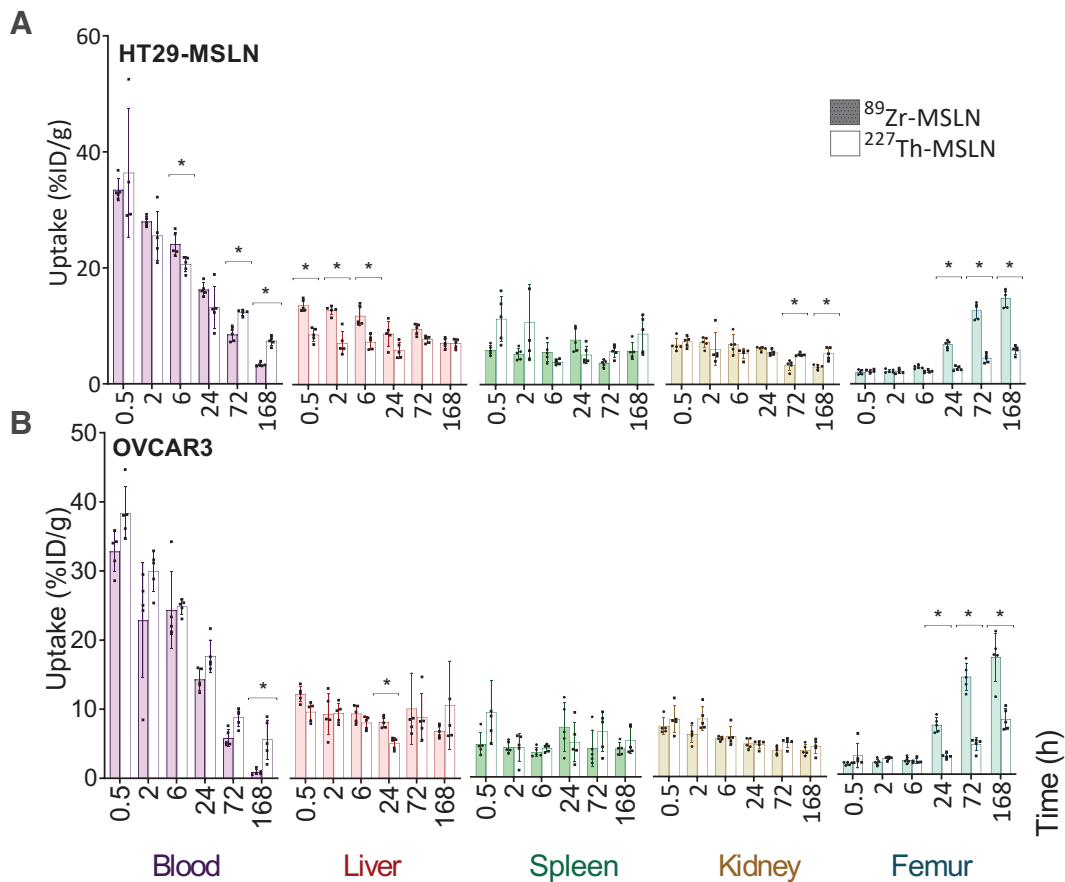

**Supplemental Figure 4. *Ex vivo* biodistribution <sup>89</sup>Zr-MSLN vs <sup>227</sup>Th-MSLN**

in **A** HT29-MSLN tumor-bearing mice and **B** OVCAR3 tumor-bearing mice. Blood levels and uptake in kidney, liver, spleen and intact femur of 20  $\mu\text{g}$  <sup>89</sup>Zr-MSLN (0.20 MBq) vs 20  $\mu\text{g}$  <sup>227</sup>Th-MSLN (0.015 MBq) at 0.5, 2, 6, 24, 72, and 168 h. Data is presented as mean percentage injected dose per gram tissue (%ID/g)  $\pm$ SD, including single data points. \*:  $P < 0.05$  with Bonferroni correction.

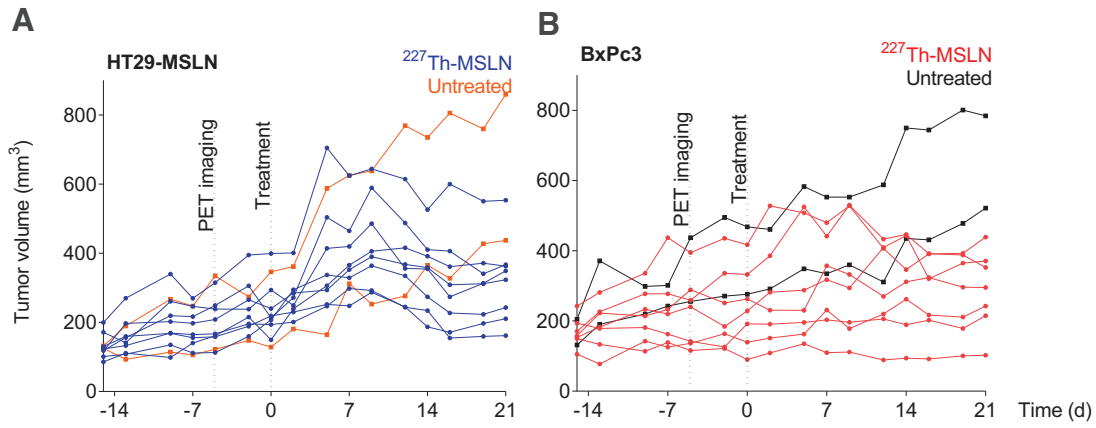

**Supplemental Figure 5. Absolute tumor growth after <sup>227</sup>Th-MSLN treatment** of **A** HT29-MSLN tumor-bearing mice (n = 8) and **B** BxPc3 tumor-bearing mice (n = 7) treated with 0.75 mg/kg 500 kBq/kg <sup>227</sup>Th-MSLN and n = 2 untreated mice per model. Tumor volumes expressed as mm<sup>3</sup>.



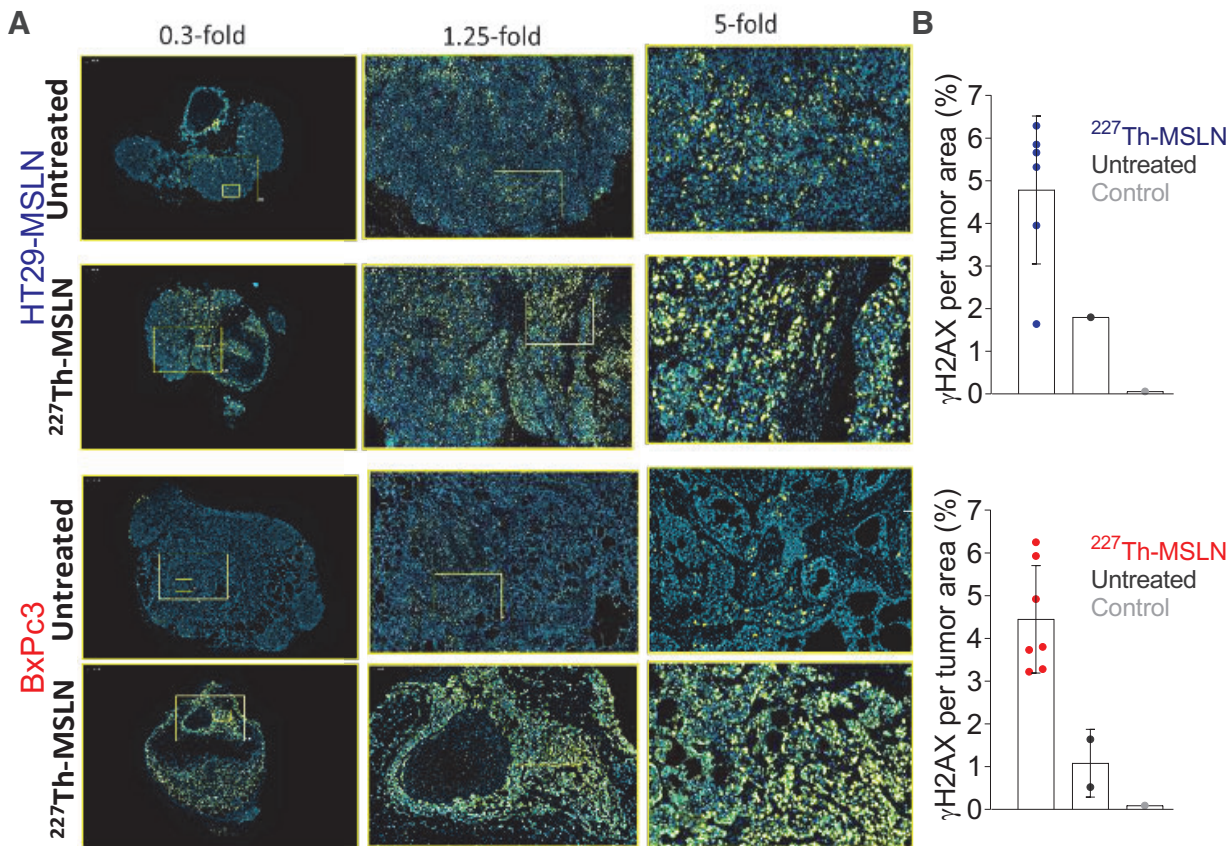

**Supplemental Figure 6.  $\gamma$ H2AX expression in tumors of mice treated with  $^{227}\text{Th}$ -MSLN**

A  $\gamma$  H2AX immunofluorescence, marking double-strand DNA breaks, in HT29-MSLN and BxPc3 tumors of 0.75 mg/kg 500 kBq/kg  $^{227}\text{Th}$ -MSLN treated (n = 6-7 per group) and untreated mice (n = 1-2 per group) harvested 21 days after injection **B** and quantification expressed as %  $\gamma$ H2AX per tumor area. Data are mean  $\pm$ SD, including single data points. Control: monoclonal mouse IgG2a antibody staining control.  $\gamma$ H2AX: gamma H2A histone family member X.

### $\gamma$ H2AX immunofluorescence

DNA double-strand breaks were detected with immunofluorescence using a human-specific gamma H2A histone family member X ( $\gamma$ H2AX) antibody (Cell Signaling, Clone JBW301, mouse), and a monoclonal mouse IgG2a antibody, clone DAK-GO5 (DAKO) was used as control (dilution 1:2000). Sections were exposed to a Cy3-labeled anti-murine-reactive antibody (Perkin Elmer; Opal™ 4-Color Fluorescent IHC Kit). Tumor sections were counter-stained using DAPI.  $\gamma$ H2AX foci were quantified using the HS Analysis Webkit tool (HS Analysis; Karlsruhe Institute of Technology, Germany).

**Supplemental Table 1:** <sup>89</sup>Zr-MSLN development for *in vivo* studies: critical conditions

| <b>Optimal conditions <sup>89</sup>Zr-MSLN production:</b>                         |                                                                                                                                                                                                                                                                                                                                                                                                                                                              |
|------------------------------------------------------------------------------------|--------------------------------------------------------------------------------------------------------------------------------------------------------------------------------------------------------------------------------------------------------------------------------------------------------------------------------------------------------------------------------------------------------------------------------------------------------------|
| Buffer exchange method                                                             | PD gravity filtration with HEPES 0.5 M pH 6.7                                                                                                                                                                                                                                                                                                                                                                                                                |
| <sup>89</sup> Zr labeling conditions                                               | 0.1 mg/mL MSLN-3,2-HOPO concentration<br>250-500 MBq/mg specific activity<br>In HEPES buffer                                                                                                                                                                                                                                                                                                                                                                 |
| Purification method                                                                | PD10 gravity filtration purification, elution with:<br>10 mM histidine 130 mM glycine buffer pH 7.4                                                                                                                                                                                                                                                                                                                                                          |
| <b><u>Avoid the following conditions to limit radioactive dimer formation:</u></b> |                                                                                                                                                                                                                                                                                                                                                                                                                                                              |
| Buffer exchange method                                                             | Ultracentrifugation (Vivaspin) or NaCl 0.9%                                                                                                                                                                                                                                                                                                                                                                                                                  |
| <sup>89</sup> Zr labeling condition                                                | > 0.1 mg/mL MSLN-HOPO concentration<br>< 200 MBq/mg specific activity<br>Buffers: <ul style="list-style-type: none"><li>• Ammonium acetate pH 7</li><li>• Ammonium acetate pH 5.5</li><li>• Citrate buffer 30 mM</li><li>• Addition of cold <sup>89</sup>Zr</li></ul>                                                                                                                                                                                        |
| Purification method                                                                | Purification by ultracentrifugation (Vivaspin)<br>PD purification with: <ul style="list-style-type: none"><li>• NaCl 0.9%</li><li>• HEPES 0.5 M pH 7</li><li>• EDTA addition before purification</li><li>• Gentisic acid</li><li>• Tris buffer pH 8.5</li><li>• Sodium phosphate buffer pH 7</li><li>• Sodium phosphate buffer pH 8.5</li><li>• Histidine glycine 10/130 mM pH 8.5</li><li>• Glucose 5%</li><li>• Arginine glycine 50/50 mM pH 8.5</li></ul> |

PD: protein desalting, EDTA: ethylenediamine tetraacetic acid.

**Supplemental Table 2:**  $^{89}\text{Zr}$ -MSLN and  $^{227}\text{Th}$ -MSLN batches for *in vivo* studies

|                                 | $^{89}\text{Zr}$ -MSLN |     |     |     | $^{89}\text{Zr}$ -control | $^{227}\text{Th}$ -MSLN |
|---------------------------------|------------------------|-----|-----|-----|---------------------------|-------------------------|
| Antibody dose ( $\mu\text{g}$ ) | 4                      | 4   | 20  | 40  | 20                        | 20                      |
| Radioactive dose (MBq)          | 1                      | 1   | 3   | 3   | 4                         | 0.015                   |
| Radiolabeling efficiency (%)    | 60                     | 60  | 64  | 92  | 76                        | 99                      |
| Antibody concentration (mg/ml)  | 0.1                    | 0.1 | 0.2 | 0.4 | 0.2                       | 0.2                     |
| Specific activity (MBq/mg)      | 400                    | 400 | 250 | 125 | 250                       | 0.7                     |
| Radiochemical purity (%)        | 99                     | 99  | 97  | 99  | 98                        | 99                      |
| Radioactive dimers (%)          | 10                     | 60  | 30  | 60  | 30                        | <10                     |
| Total antibody dimers (%)       | <5                     | 5   | 5   | 5   | 5                         | <5                      |

Batches of 4  $\mu\text{g}$  and 40  $\mu\text{g}$   $^{89}\text{Zr}$ -MSLN were injected in the BxPc3 tumor-bearing mice (Suppl. Fig. 3), 20  $\mu\text{g}$   $^{89}\text{Zr}$ -MSLN and  $^{89}\text{Zr}$ -control were injected in HT29-MSLN tumor-bearing mice (Fig. 1). The 20  $\mu\text{g}$   $^{227}\text{Th}$ -MSLN was injected in HT29-MSLN tumor-bearing mice (Fig. 5).
